# Supplementary material for: Material design for converting an oxidative-type BiVO4 catalyst into a reductive BiV(S,O)4−x sulfo-oxide catalyst for nitrogen photoreduction to ammonia
Source: Royal Society of Chemistry journal article supplement (doi:10.1039/d3ta04428a), 2023-01-01
Supplement: d3ta04428a1.pdf [file d3ta04428a1.pdf]

# Supporting Information

## Material design in converting an oxidative-type BiVO<sub>4</sub> catalyst into a reductive BiV(S,O)<sub>4-x</sub> sulfo-oxide catalyst for nitrogen photoreduction to ammonia

Xiaoyun Chen<sup>1,\*</sup>, Pengkun Zhang<sup>1</sup>, Dong-Hau Kuo<sup>2,\*</sup>, Qinhan Wu<sup>1</sup>, Adugna Boke Abdeta<sup>1</sup>, Binhong Wu<sup>1</sup>, Zhengjie Su<sup>1</sup>, Longyan Chen<sup>1</sup>, Osman Ahmed Zelekew<sup>3</sup>, Jinguo Lin<sup>1,\*</sup>

<sup>1</sup>College of Materials Engineering, Fujian Agriculture and Forestry University, Fuzhou 350002, China

<sup>2</sup>Department of Materials Science and Engineering, National Taiwan University of Science and Technology, Taipei 10607, Taiwan

<sup>3</sup>Department of Materials Science and Engineering, Adama Science and Technology University, Adama, Ethiopia

\*Corresponding author

*E-mail address:* [dhkuo@mail.ntust.edu.tw](mailto:dhkuo@mail.ntust.edu.tw) (D.-H. Kuo)

*E-mail address:* [fjlinjg@126.com](mailto:fjlinjg@126.com) (J. G. Lin)

*E-mail address:* [fjchenxy@126.com](mailto:fjchenxy@126.com) (X. Y. Chen)

## Experimental Section

### 1. Computation of apparent quantum efficiency (AQE) and solar-to-ammonia (STA) conversion efficiency

According to the literature reports [1], the apparent quantum efficiency (AQE) is determined. The catalytic experiments for determining AQE were performed in pure water (100 mL) without any sacrificial reagents. 50 mg of BiVOS-2, used as the photocatalyst, was added to the solution. The reaction solution was irradiated by a 300 W Xe lamp with a band-pass filter for the wavelength of 420 nm. The photon flux of the incident light was measured by a CEL-NP2000 photoradiometer. The AQE is calculated according to the equation below:

$$\text{AQE} = \frac{\text{Number of reacted electrons}}{\text{Number of incident photons}} \times 100\% = \frac{6 \cdot n_{\text{AM}} \cdot N_A}{\frac{W \cdot A \cdot t}{h \cdot \nu}} \times 100\%$$

where  $n_{\text{AM}}$  represents the molar number of generated ammonia, while  $W$ ,  $A$ ,  $t$ , and  $\nu$  are for the incident light intensity, irradiation area, time, and frequency, respectively.  $N_A$  and  $h$  are Avogadro's constant and Planck constant, respectively.

According to the literature reports [2,3], to determine the Solar-to-Ammonia (STA) conversion efficiency, reactions were performed using a solar simulator, where the efficiency was calculated as:

$$\text{STA} = \frac{[\Delta G \text{ for } \text{NH}_3 \text{ generation (J} \cdot \text{mol}^{-1})] \times [\text{NH}_3 \text{ evolved (mol)}]}{[\text{total input energy (W)}] \times [\text{reaction time (s)}]} \times 100\%$$

In the above equations, the  $\Delta G^\circ$  values for  $\text{NH}_3$  generation is  $339 \text{ kJ} \cdot \text{mol}^{-1}$ . The overall irradiance of the AM1.5G spectrum was  $100 \text{ mW cm}^{-2}$  and the irradiation area was  $4.26 \text{ cm}^2$ .

## 2. $\text{NH}_3$ product characterization and qualification.

### 2.1 Indophenol blue method

Following the literature reports [4,5]: 4 mL solution reaction solution was mixed with 50  $\mu\text{L}$  of catalyst solution (1% BiVOS aqueous solution), 500  $\mu\text{L}$  coloring solution (aqueous solution of 0.4 M  $\text{C}_7\text{H}_5\text{O}_3\text{Na}$  and 0.32 M NaOH) and 50  $\mu\text{L}$  oxidizing solution [ $\text{NaClO}$  ( $\rho\text{Cl} = 4\text{--}4.9$ ) solution containing 0.75 M NaOH] in turn. Then, the mixture was allowed to stand at 25  $^\circ\text{C}$  for 2h. The standard curve was obtained from the absorbance at 660 nm.

### 2.2 Ion chromatography test conditions

According to the literature reports [6]: The Thermo Fisher ICS-600 cationic ion chromatograph with Pac CS12 A 4 $\times$ 250 mm (ICS), was further used to determine the  $\text{NH}_3$  concentration. The testing conditions as listed in the table S1.

Table S1 ICS determine the conditions of the  $\text{NH}_3$  concentration

| Conditions        | Details                                     | Conditions      | Details                                        |
|-------------------|---------------------------------------------|-----------------|------------------------------------------------|
| Analytical column | Ion Pac CS12 A 4 $\times$ 250 mm            | Run time        | 15 min                                         |
| Protective column | Ion Pac CG12A 4 $\times$ 50 mm              | Detector        | Conductivity detector                          |
| Leacheate         | 20 mM Methyl sulfonic acid aqueous solution | Suppressor      | CDRS 600 (4 mm)<br>Self-circulation inhibition |
| Flow rate         | 1.0 mL/min                                  | Sample injector | AS-DV                                          |
| Sample volume     | 10 ul                                       | Sampling mode   | Automatic sampling                             |

### 3. Density functional theory calculation

The density functional theory (DFT) calculation was performed with the Vienna ab initio simulation package (VASP) by using the projector augmented wave (PAW) function method [7]. A plane-wave basis set was adopted to expand the smooth part of wave functions. The generalized gradient approximation (GGA) with Perdew–Burke-Ernzerhof (PBE) function was used for considering the electron exchange and correlation effect [8, 9]. A  $2\times 2\times 2$  supercell with 52 atoms was adopted for structures considered in this study. Dispersion correction (DFT-D3) proposed by Grimme was employed to describe the Van-Der-Waals force accurately. In the process of geometry optimization, atomic relaxation was considered by referring to the Hellmann-Feynman force smaller than  $0.02\text{ eV/\AA}$ . The convergence criterion was set to have low energy of  $1\times 10^{-5}\text{ eV}$  during the electronic self-consistent loop. The Brillouin-zone integration used the gamma-centered ( $2\times 2\times 1$ ) k-point grids for the geometry optimization [10]. Bader charge population analysis was used to compute the atomic charge [11,12]. The adsorption energy ( $E_{\text{ads.}}$ ) of adsorbates is calculated from the equation:

$$E_{\text{ads.}} = E_{\text{tot.}} - E_{\text{cat.}} - E_{\text{N}_2}$$

where the  $E_{\text{tot.}}$ ,  $E_{\text{cat.}}$ , and  $E_{\text{N}_2}$  represent the total energy of the complex of the catalysts and  $\text{N}_2$ , the energy of the catalysts, and the energy of the isolated  $\text{N}_2$  molecule, respectively.

## Additional figures and tables

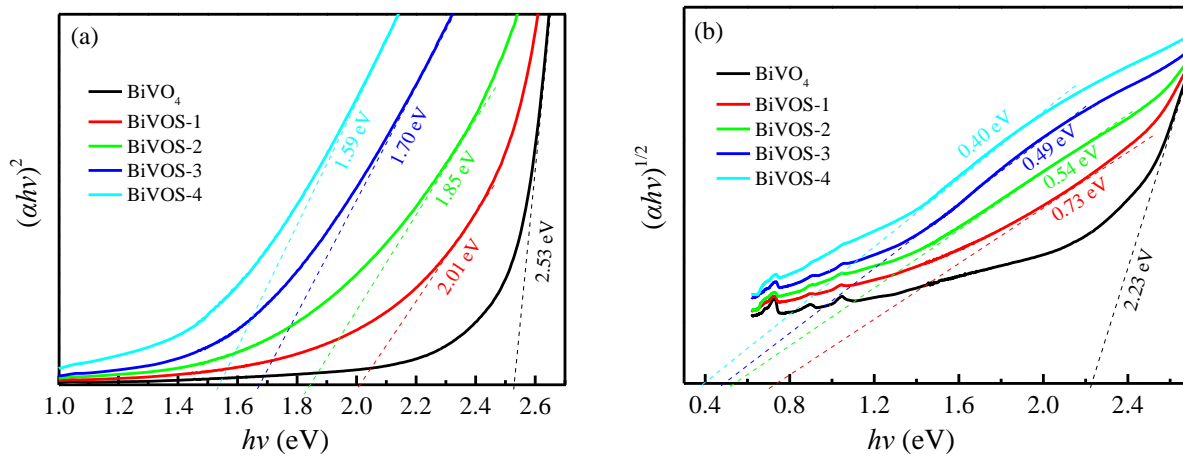

**Fig. S1** The ultraviolet-visible absorption spectra of BiVO<sub>4</sub>, and BiVOS catalysts converted to (a) the  $(\alpha h\nu)^2 - h\nu$  plots for the direct bandgap calculation and (b) the  $(\alpha h\nu)^{1/2} - h\nu$  plots for the indirect bandgap calculation.

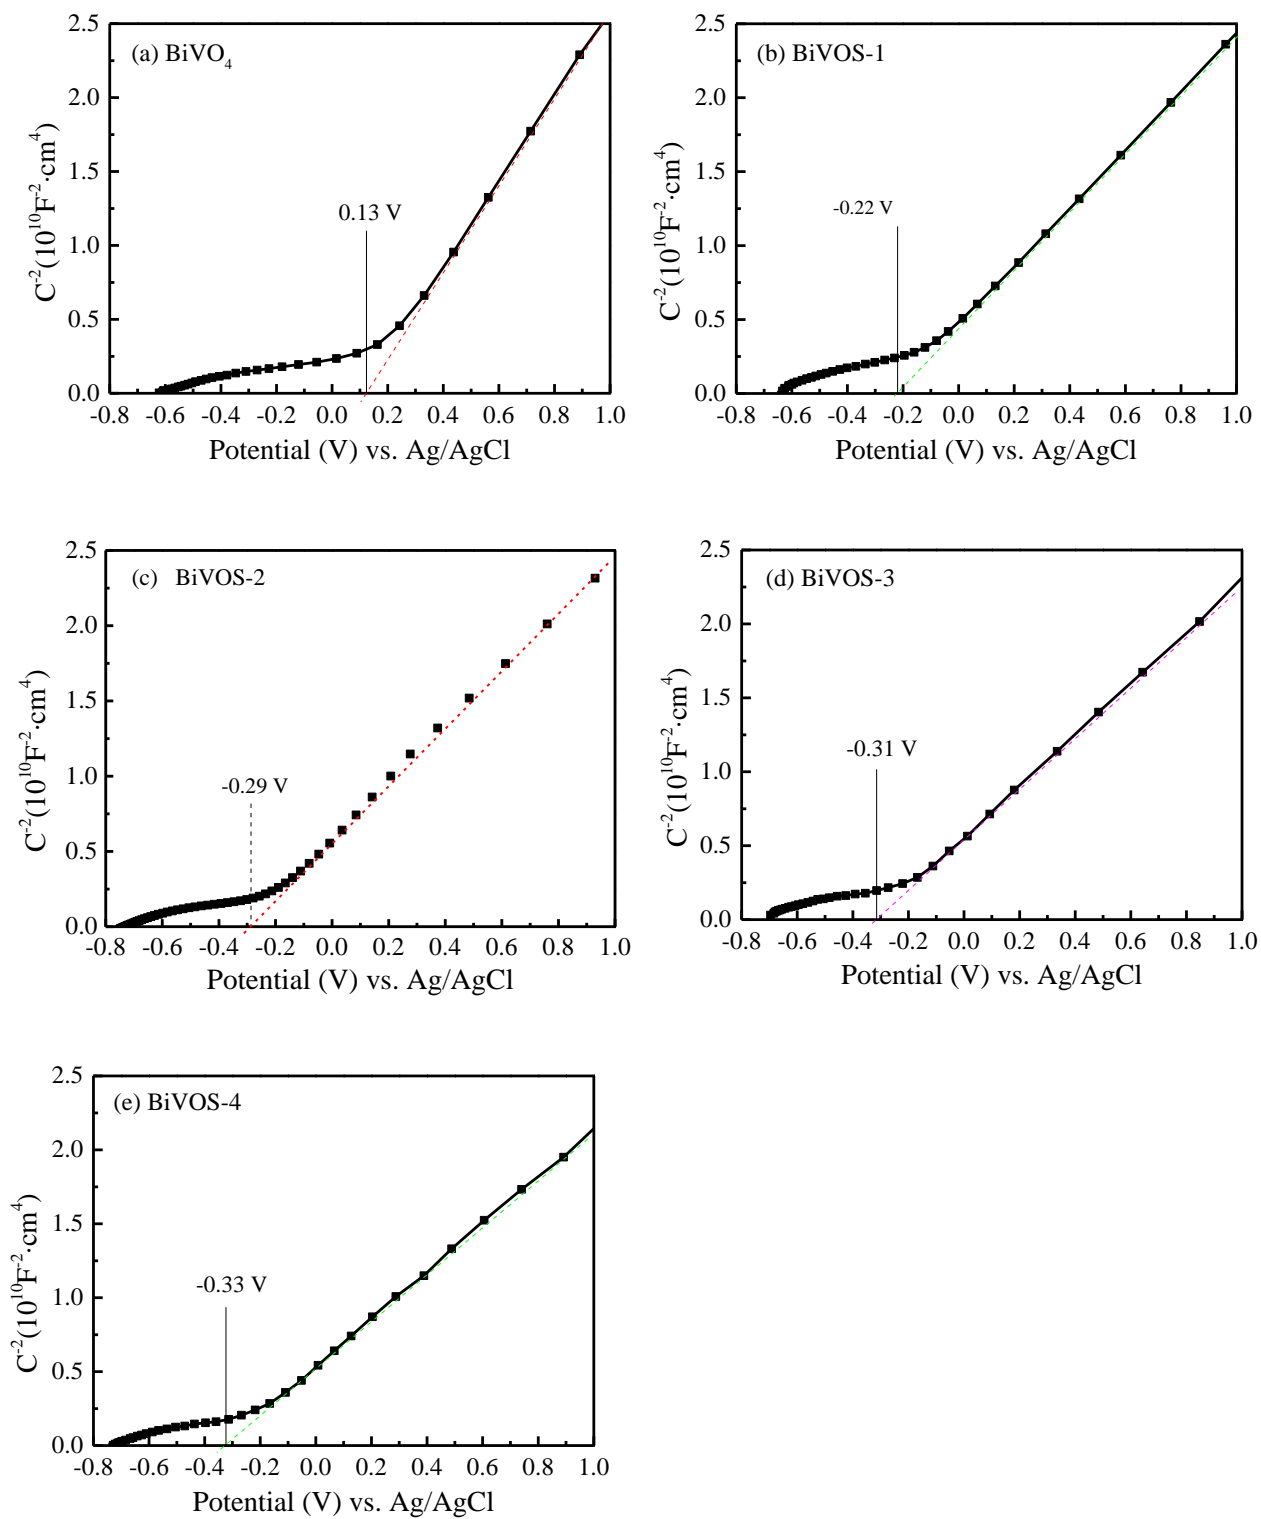

Fig. S2 (a-d) Mott-Schottky curves of  $\text{BiVO}_4$  and BiVOS catalysts conducting at 1000 Hz.

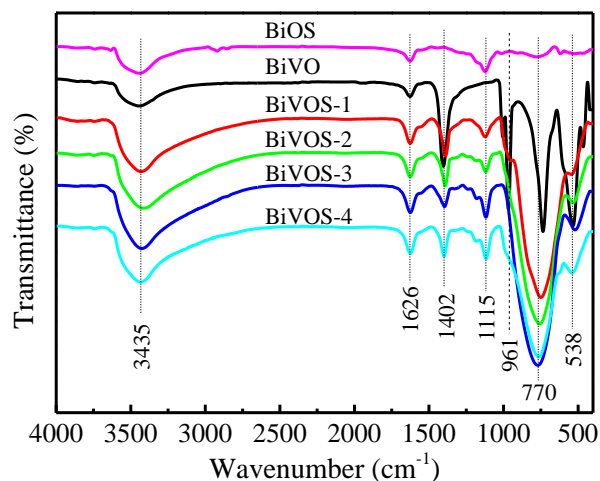

Fig. S3 FTIR spectra of BiOS, BiVO<sub>4</sub>, and BiVOS catalysts.

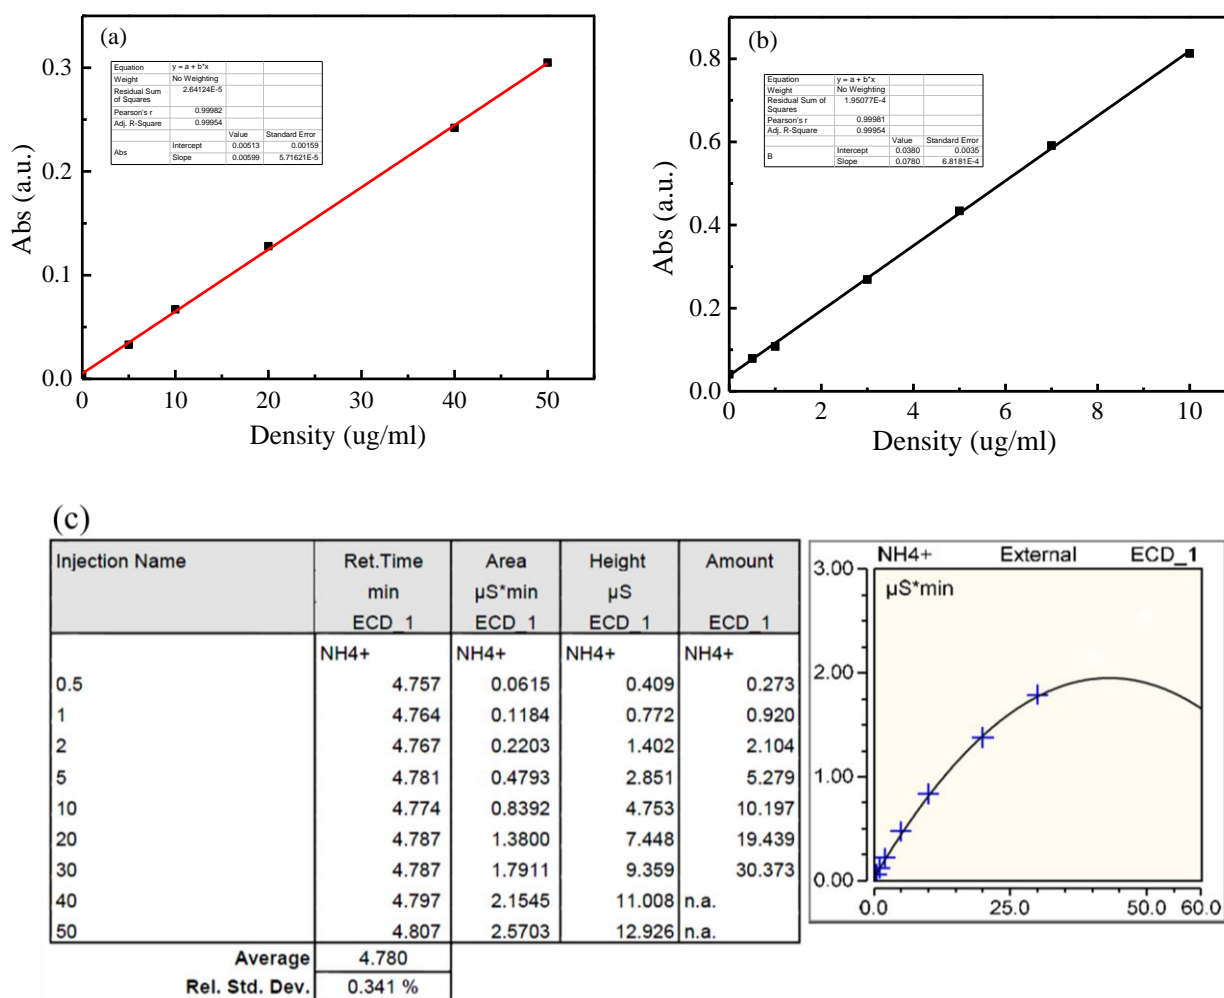

Fig. S4 The standard curve of (a) Nessler's reagent, (b) indophenol blue, and (c) ion chromatography for ammonium ion concentration detection.

**Table S2** XPS composition and physical characteristics of BiVO<sub>4</sub> and BiVOS catalysts

| Catalyst                  | Molar percentage /% |       |      |       | O molar percentage /% |                | V <sup>4+</sup> /<br>(V <sup>4+</sup> +V <sup>5+</sup> )<br>(%) | Anion/<br>Cation | S <sub>BET</sub><br>(m <sup>2</sup> /g) | Crystal<br>size /nm |
|---------------------------|---------------------|-------|------|-------|-----------------------|----------------|-----------------------------------------------------------------|------------------|-----------------------------------------|---------------------|
|                           | Bi                  | V     | S    | O     | O <sub>Lattice</sub>  | V <sub>O</sub> |                                                                 |                  |                                         |                     |
| BiVO <sub>4</sub>         | 16.65               | 16.69 | —    | 66.66 | 100                   | —              | —                                                               | 2.00             | 26.8                                    | 13.5                |
| BiVOS-1                   | 17.42               | 17.35 | 4.36 | 60.87 | 93.17                 | 6.83           | 3.45                                                            | 1.88             | 31.2                                    | 11.8                |
| BiVOS-2                   | 17.76               | 17.70 | 7.08 | 57.46 | 77.49                 | 22.51          | 17.86                                                           | 1.82             | 31.9                                    | 11.3                |
| BiVOS-3                   | 18.24               | 18.18 | 8.46 | 55.12 | 82.74                 | 17.26          | 11.62                                                           | 1.75             | 32.5                                    | 11.1                |
| BiVOS-4                   | 18.56               | 18.49 | 9.58 | 53.47 | 91.68                 | 8.32           | 5.35                                                            | 1.70             | 32.7                                    | 10.8                |
| BiVOS-2<br>after reaction | 17.77               | 17.66 | 7.12 | 57.45 | 77.55                 | 22.45          | 17.91                                                           | 1.82             | —                                       | 11.4                |

**Table S3** Element contents from SEM-EDS analyses for BiVO<sub>4</sub> and BiVOS catalysts

| Catalyst          | Bi    | V     | S    | O     | Bi/V  |
|-------------------|-------|-------|------|-------|-------|
| BiVO <sub>4</sub> | 16.47 | 16.39 | —    | 67.14 | 0.993 |
| BiCeOS-1          | 17.34 | 17.53 | 4.18 | 60.95 | 0.993 |
| BiCeOS-2          | 17.60 | 17.76 | 6.99 | 57.65 | 0.992 |
| BiCeOS-3          | 18.03 | 18.26 | 8.34 | 55.37 | 0.992 |
| BiCeOS-4          | 18.33 | 18.64 | 9.25 | 53.78 | 0.994 |

**Table S4** Element contents from XRF analyses for BiVO<sub>4</sub> and BiVOS catalysts

| Catalysts         | Bi    | V     | S    | O     | Bi/Ce |
|-------------------|-------|-------|------|-------|-------|
| BiVO <sub>4</sub> | 16.61 | 16.69 | —    | 66.70 | 0.995 |
| BiCeOS-1          | 17.61 | 17.59 | 4.23 | 60.57 | 0.992 |
| BiCeOS-2          | 17.83 | 17.79 | 7.01 | 57.37 | 0.994 |
| BiCeOS-3          | 18.16 | 18.11 | 8.40 | 55.33 | 0.994 |
| BiCeOS-4          | 18.50 | 18.48 | 9.39 | 53.63 | 0.993 |



**Table S5** The average charge carrier lifetime of BiVO<sub>4</sub> and BiVOS catalysts

| Catalysts         | A <sub>1</sub> | τ <sub>1</sub> (ns) | A <sub>2</sub> | τ <sub>2</sub> (ns) | R <sup>2</sup> | τ <sub>avg</sub> (ns) |
|-------------------|----------------|---------------------|----------------|---------------------|----------------|-----------------------|
| BiVO <sub>4</sub> | 73737.926      | 1.023               | 692.698        | 3.729               | 0.991          | 1.113                 |
| BiVOS-1           | 1991.507       | 4.982               | 140955.125     | 1.525               | 0.996          | 1.678                 |
| BiVOS-2           | 78690.627      | 2.575               | 8817.568       | 5.797               | 0.999          | 3.224                 |
| BiVOS-3           | 8457.489       | 4.213               | 377682.855     | 2.386               | 0.998          | 2.455                 |
| BiVOS-4           | 659945.746     | 1.784               | 6592.964       | 4.162               | 0.997          | 1.838                 |

**Table S6** the testing results via Nessler's reagent, indophenol blue and ion chromatography method

| Catalysts | Nessler's reagent<br>(μmol·g <sup>-1</sup> ·h <sup>-1</sup> ) | indophenol blue<br>(μmol·g <sup>-1</sup> ·h <sup>-1</sup> ) | ion chromatography<br>(μmol·g <sup>-1</sup> ·h <sup>-1</sup> ) |
|-----------|---------------------------------------------------------------|-------------------------------------------------------------|----------------------------------------------------------------|
| BiVOS-1   | 120.2                                                         | 124.9                                                       | 112.5                                                          |
| BiVOS-2   | 563.6                                                         | 541.0                                                       | 519.5                                                          |
| BiVOS-3   | 406.1                                                         | 385.7                                                       | 378.4                                                          |
| BiVOS-4   | 98.9                                                          | 92.2                                                        | 87.6                                                           |

**Table S7** Adsorption energy ( $E_a$ , eV) and bond length ( $L_b$ , Å) of N<sub>2</sub> on perfect-BiVO<sub>4</sub>, Vo-BiVO<sub>4</sub>, perfect-BiVOS, and Vo-BiVOS (0 0 2) surface. Electron transfer ( $E_t$ ) of N<sub>2</sub> molecule. '+' represents that the electrons are transferred to the catalyst atom.

| Catalyst                  | Adsorption energy/ eV | N≡N bond length /Å | Electron transfer |
|---------------------------|-----------------------|--------------------|-------------------|
| N <sub>2</sub> molecule   | —                     | 1.102              | —                 |
| Perfect-BiVO <sub>4</sub> | -0.08                 | 1.113              | +0.01             |
| Vo-BiVO <sub>4</sub>      | -0.10                 | 1.117              | +0.06             |
| Perfect-BiVOS             | -0.15                 | 1.120              | +0.04             |
| Vo-BiVOS                  | -0.52                 | 1.148              | +0.22             |

**Table S8** The literature-reported catalysts for photocatalytic N<sub>2</sub> fixation

| No. | Catalysts                                                             | Light source               | Reaction medium                                  | Sacrificial agent               | NH <sub>3</sub> evolved<br>μmol·g <sup>-1</sup> ·h <sup>-1</sup> | NH <sub>3</sub> analysis methods                                                                 | AQE/QY and STA conversion efficiency   | Ref. (Year)    |
|-----|-----------------------------------------------------------------------|----------------------------|--------------------------------------------------|---------------------------------|------------------------------------------------------------------|--------------------------------------------------------------------------------------------------|----------------------------------------|----------------|
| 1   | CeO <sub>2</sub> -BiFeO <sub>3</sub>                                  | UV-vis                     | Water                                            | none                            | 117.77<br>μmol·g <sup>-1</sup> ·h <sup>-1</sup>                  | Nessler's reagent method                                                                         | —                                      | [13]<br>(2020) |
| 2   | TiO <sub>2</sub> /SrTiO <sub>3</sub> /g-C <sub>3</sub> N <sub>4</sub> | simulated solar light      | Water, ethanol (10%, v/v)                        | ethanol                         | 2192.0<br>μmol·g <sup>-1</sup> ·h <sup>-1</sup>                  | Nessler's reagent method                                                                         | —                                      | [14]<br>(2020) |
| 3   | Ag-KNbO <sub>3</sub>                                                  | simulated solar light      | Water, ethanol (10%, v/v)                        | ethanol                         | 385.0<br>μmol·g <sup>-1</sup> ·h <sup>-1</sup>                   | Nessler's reagent method                                                                         | —                                      | [15]<br>(2019) |
| 4   | LaCoO <sub>3</sub> :Er <sup>3+</sup> /ATP                             | visible                    | Water, ethanol (10%, v/v)                        | ethanol                         | 71.5<br>μmol·g <sup>-1</sup> ·h <sup>-1</sup>                    | Nessler's reagent method                                                                         | —                                      | [16]<br>(2019) |
| 5   | Bi-Bi <sub>2</sub> WO <sub>6</sub>                                    | simulated solar light      | Water                                            | none                            | 86.0<br>μmol·g <sup>-1</sup> ·h <sup>-1</sup>                    | Nessler's reagent method                                                                         | —                                      | [17]<br>(2019) |
| 6   | c-PAN-Bi <sub>2</sub> WO <sub>6</sub>                                 | simulated solar light      | Water                                            | none                            | 160.0<br>μmol·g <sup>-1</sup> ·h <sup>-1</sup>                   | Nessler's reagent method                                                                         | —                                      | [18]<br>(2018) |
| 7   | Mo-Bi <sub>5</sub> O <sub>7</sub> Br                                  | 300 W Xe lamp (λ > 420 nm) | Water                                            | none                            | 122.9<br>μmol·g <sup>-1</sup> ·h <sup>-1</sup>                   | Nessler's reagent method                                                                         | —                                      | [19]<br>(2021) |
| 8   | Fe-BiOBr                                                              | 300 W Xe lamp (λ > 420 nm) | Water                                            | none                            | 46.1<br>μmol·g <sup>-1</sup> ·h <sup>-1</sup>                    | Nessler's reagent method                                                                         | —                                      | [20]<br>(2021) |
| 9   | SrTiO <sub>3</sub>                                                    | 300 W Xe lamp              | Water                                            | none                            | 206.0<br>μmol·g <sup>-1</sup> ·h <sup>-1</sup>                   | Ion chromatography                                                                               | AQE= 0.38% at 420 nm                   | [21]<br>(2021) |
| 10  | Mo-doped W <sub>18</sub> O <sub>49</sub>                              | 300 W Xe lamp (λ > 420 nm) | Na <sub>2</sub> SO <sub>3</sub> aqueous solution | Na <sub>2</sub> SO <sub>3</sub> | 195.50<br>μmol·g <sup>-1</sup> ·h <sup>-1</sup>                  | Nessler's reagent method                                                                         | AQE= 0.33% at 400 nm                   | [22]<br>(2018) |
| 11  | Au/TiO <sub>2</sub>                                                   | 300 W Xe lamp (λ > 420 nm) | Water, methanol (10%, v/v)                       | methanol                        | 78.60<br>μmol·g <sup>-1</sup> ·h <sup>-1</sup>                   | Indophenol-blue method                                                                           | AQE= 0.82% at 550 nm                   | [23]<br>(2018) |
| 12  | Hydrogenated Bi <sub>2</sub> MoO <sub>6</sub>                         | 300 W Xe lamp              | Water and air                                    | none                            | 1.30<br>mmol·g <sup>-1</sup> ·h <sup>-1</sup>                    | Nessler's reagent method                                                                         | AQE= 2.42% at 420 nm                   | [24]<br>(2016) |
| 13  | Zn <sub>3</sub> In <sub>2</sub> S <sub>6</sub>                        | 300 W Xe lamp (λ > 420 nm) | Methanol                                         | methanol                        | 355.20<br>mg·L <sup>-1</sup> ·g <sup>-1</sup>                    | Nessler's reagent method                                                                         | —                                      | [25]<br>(2020) |
| 14  | Br-doped BiOCl                                                        | 300 W Xe lamp (λ > 420 nm) | Water                                            | none                            | 6.30 μmol·h <sup>-1</sup>                                        | Nessler's reagent method                                                                         | —                                      | [26]<br>(2019) |
| 15  | MoS <sub>2</sub>                                                      | 500 W Xe lamp              | Water                                            | none                            | 325.0<br>μmol·g <sup>-1</sup> ·h <sup>-1</sup>                   | Indophenol-blue method and <sup>1</sup> H-NMR with <sup>15</sup> N <sub>2</sub> isotope labeling | —                                      | [27]<br>(2017) |
| 16  | Cu-doped TiO <sub>2</sub>                                             | 300 W Xe lamp              | Water                                            | none                            | 78.90<br>μmol·g <sup>-1</sup> ·h <sup>-1</sup>                   | Nessler's reagent method and ion chromatography                                                  | AQE= 0.74% at 380 nm = 0.23% at 420 nm | [28]<br>(2019) |

|    |                                                                  |                                |                                  |          |                                                 |                                                                                                                                |                         |                |
|----|------------------------------------------------------------------|--------------------------------|----------------------------------|----------|-------------------------------------------------|--------------------------------------------------------------------------------------------------------------------------------|-------------------------|----------------|
| 17 | Fe-doped BiOCl                                                   | 300 W Xe lamp                  | Water                            | none     | 1.02<br>mmol·g <sup>-1</sup> ·h <sup>-1</sup>   | Indophenol-blue<br>method and <sup>1</sup> H-<br>NMR with <sup>15</sup> N <sub>2</sub><br>isotope labeling                     | AQE= 1.80%<br>at 420 nm | [29]<br>(2019) |
| 18 | Fe-doped BiOBr                                                   | 300 W Xe lamp<br>(λ > 420 nm)  | Water                            | none     | 382.68<br>μmol·g <sup>-1</sup> ·h <sup>-1</sup> | Nessler's reagent<br>method, <sup>1</sup> H NMR,<br>mass spectroscopy<br>with <sup>15</sup> N <sub>2</sub> isotope<br>labeling | —                       | [30]<br>(2020) |
| 19 | Bi <sub>2</sub> MoO <sub>6</sub> /BiOBr                          | 300 W Xe lamp<br>visible light | Water                            | none     | 90.70<br>μmol·g <sup>-1</sup> ·h <sup>-1</sup>  | Nessler's reagent<br>method                                                                                                    | —                       | [31]<br>(2019) |
| 20 | P-doped g-C <sub>3</sub> N <sub>4</sub>                          | 2 KW Xe lamp<br>(λ > 420 nm)   | Water                            | none     | 0.20 μmol·h <sup>-1</sup>                       | Ion chromatography                                                                                                             | STA= 0.1%               | [2]<br>(2018)  |
| 21 | S-doped g-C <sub>3</sub> N <sub>4</sub>                          | 500 W Xe lamp                  | Water,<br>methanol<br>(4%, v/v)  | methanol | 5.99<br>mmol·g <sup>-1</sup> ·h <sup>-1</sup>   | Nessler's reagent<br>method                                                                                                    | —                       | [32]<br>(2018) |
| 22 | Defected Bi <sub>3</sub> O <sub>4</sub> Br<br>nanosheets         | 300 W Xe lamp                  | Water                            | none     | 380.0<br>μmol·g <sup>-1</sup> ·h <sup>-1</sup>  | Nessler's reagent<br>method and ion<br>chromatography                                                                          | AQE= 1.59%<br>at 400 nm | [33]<br>(2019) |
| 23 | Bi <sub>5</sub> O <sub>7</sub> Br<br>nanotubes                   | 300 W Xe lamp<br>(λ > 420 nm)  | Water                            | none     | 1.38<br>mmol·g <sup>-1</sup> ·h <sup>-1</sup>   | Nessler's reagent<br>method                                                                                                    | AQE= 2.3%<br>at 420 nm  | [34]<br>(2017) |
| 24 | Yb <sup>3+</sup> /Tm <sup>3+</sup> co-<br>doped CeF <sub>3</sub> | 300 W Xe lamp                  | Water                            | none     | 15.06<br>μmol·g <sup>-1</sup> ·h <sup>-1</sup>  | Nessler's reagent<br>method                                                                                                    | —                       | [35]<br>(2022) |
| 25 | WO <sub>3</sub> /CdS                                             | 300 W Xe lamp                  | Water                            | none     | 35.8<br>μmol·g <sup>-1</sup> ·h <sup>-1</sup>   | ion chromatography                                                                                                             | —                       | [36]<br>(2022) |
| 26 | Cu <sub>2</sub> O/SnS <sub>2</sub> /SnO <sub>2</sub>             | 300 W Xe lamp                  | Water,<br>ethanol<br>(20%, v/v)  | ethanol  | 66.35<br>μmol·g <sup>-1</sup> ·h <sup>-1</sup>  | Nessler's reagent<br>method                                                                                                    | —                       | [37]<br>(2021) |
| 27 | La/MoO <sub>3-x</sub>                                            | 300 W Xe lamp                  | Water                            | none     | 209<br>μmol·g <sup>-1</sup> ·h <sup>-1</sup>    | ion chromatography                                                                                                             | —                       | [38]<br>(2022) |
| 28 | AgPt-TiO <sub>2</sub>                                            | 300 W Xe lamp                  | Water                            | none     | 38.4<br>μmol·g <sup>-1</sup> ·h <sup>-1</sup>   | ion chromatography                                                                                                             | —                       | [39]<br>(2021) |
| 29 | Pt/N-MoS <sub>2</sub>                                            | 300 W Xe lamp                  | Water,<br>methanol<br>(10%, v/v) | methanol | 133.8<br>μmol·g <sup>-1</sup> ·h <sup>-1</sup>  | Nessler's reagent<br>method                                                                                                    | —                       | [40]<br>(2020) |
| 30 | Ag/B-doped g-<br>C <sub>3</sub> N <sub>4</sub>                   | 300 W Xe lamp                  | Water,<br>methanol<br>(5%, v/v)  | methanol | 305<br>μmol·g <sup>-1</sup> ·h <sup>-1</sup>    | Nessler's reagent<br>method                                                                                                    | —                       | [41]<br>(2020) |
| 31 | UiO-66                                                           | 300 W Xe lamp                  | Water,<br>methanol<br>(5%, v/v)  | methanol | 256<br>μmol·g <sup>-1</sup> ·h <sup>-1</sup>    | Nessler's reagent<br>method                                                                                                    | —                       | [42]<br>(2021) |
| 32 | Pt/Bi-<br>KTa <sub>0.5</sub> Nb <sub>0.5</sub> O <sub>3</sub>    | 300 W Xe lamp                  | Water,<br>methanol<br>(5%, v/v)  | methanol | 38.57<br>μmol·g <sup>-1</sup> ·h <sup>-1</sup>  | Nessler's reagent<br>method                                                                                                    | —                       | [43]<br>(2022) |

|    |                                                                   |                               |                                           |                                 |                                                 |                                                       |                                                     |                |
|----|-------------------------------------------------------------------|-------------------------------|-------------------------------------------|---------------------------------|-------------------------------------------------|-------------------------------------------------------|-----------------------------------------------------|----------------|
| 33 | Au/(BiO) <sub>2</sub> CO <sub>3</sub>                             | 300 W Xe lamp                 | Water                                     | none                            | 38.2<br>μmol·g <sup>-1</sup> ·h <sup>-1</sup>   | ion chromatography                                    | —                                                   | [44]<br>(2017) |
| 34 | Ag/AgBr-δ-Bi <sub>2</sub> O <sub>3</sub>                          | 400 W Xe lamp                 | Water                                     | none                            | 364.2<br>μmol·g <sup>-1</sup> ·h <sup>-1</sup>  | Nessler's reagent<br>method                           | —                                                   | [45]<br>(2019) |
| 35 | BiO QDs-g-C <sub>3</sub> N <sub>4</sub>                           | 300 W Xe lamp                 | Na <sub>2</sub> SO <sub>3</sub><br>(1 mM) | Na <sub>2</sub> SO <sub>3</sub> | 576.11<br>μmol·g <sup>-1</sup> ·h <sup>-1</sup> | Nessler's reagent<br>method                           | AQE= 0.53%<br>at 420 nm                             | [46]<br>(2021) |
| 36 | g-C <sub>3</sub> N <sub>4</sub> /Bi <sub>2</sub> MoO <sub>6</sub> | 500 W Xe lamp<br>(λ > 420 nm) | ethanol<br>(17.1 mM)                      | ethanol                         | 43.61<br>μmol·g <sup>-1</sup> ·h <sup>-1</sup>  | Nessler's reagent<br>method                           | —                                                   | [47]<br>(2020) |
| 37 | BiVOS                                                             | 300 W Xe lamp<br>(λ > 420 nm) | Water                                     | none                            | 563.6<br>μmol·g <sup>-1</sup> ·h <sup>-1</sup>  | Nessler's reagent<br>method and ion<br>chromatography | AQE= 2.18%<br>at 420 nm<br>STA= 0.071%<br>at AM1.5G | This<br>work   |

## References:

- [1] X. Chen, X. Zhang, Y. Li, M. Qi, J. Li, Z. Tang, Z. Zhou, Y. Xu, Transition metal doping BiOBr nanosheets with oxygen vacancy and exposed {102} facets for visible light nitrogen fixation, *Appl. Catal. B-Environ.*, 281 (2021) 119516
- [2] Y. Shiraishi, S. Shiota, Y. Kofuji, M. Hashimoto, K. Chishiro, H. Hirakawa, S. Tanaka, S. Ichikawa, T. Hirai, Nitrogen fixation with water on carbon-nitride-based metal-free photocatalysts with 0.1% Solar-to-Ammonia energy conversion efficiency. *ACS Appl. Energy Mater.*, 1 (2018) 4169–4177.
- [3] Z. Chen, T.F. Jaramillo, T.G. Deutsch, A. Kleiman-Shwarsctein, A.J. Forman, N. Gaillard, R. Garland, K. Takanebe, C. Heske, M. Sunkara, E.W. McFarland, K. Domen, E.L. Miller, J.A. Turner, H.N. Dinh, Accelerating materials development for photoelectrochemical hydrogen production: Standards for methods, definitions, and reporting protocols, *J. Mater. Res.*, 25 (2010) 3-16.
- [4] T. Hu, G. Jiang, Y. Yan, S. Lan, J. Xie, Q. Zhang, Y. Li, Facile synthesis of Fe single-atom porous photocatalysts via direct metal atomization achieving efficient photocatalytic nitrogen fixation, *J. Mater. Sci. Technol.*, 167 (2023) 248–257
- [5] Y. Zhao, F. Wu, Y. Miao, C. Zhou, N. Xu, R. Shi, L.-Z. Wu, J. Tang, T. Zhang, Revealing ammonia quantification minefield in photo/electrocatalysis, *Angew. Chem. Int. Ed.* 10.1002/anie.202108769.
- [6] N. Zhang, A. Jalil, D. Wu, S. Chen, Y. Liu, C. Gao, W. Ye, Z. Qi, H. Ju, C. Wang, X. Wu, L. Song, J. Zhu, Y. Xiong, Refining defect states in  $W_{18}O_{49}$  by Mo doping: A strategy for tuning  $N_2$  activation towards solar-driven nitrogen fixation, *J. Am. Chem. Soc.*, 140 (2018) 9434-9443.

- [7] J.F. G. Kresse, Efficiency of ab-initio total energy calculations for metals and semiconductors using a plane-wave basis set, *Comp. Mater. Sci.*, 6 (1996) 15–50.
- [8] K.B. J.P. Perdew, M. Ernzerhof, Generalized gradient approximation made simple, *Phys. Rev. Lett.*, 77 (1996) 3865.
- [9] F.A.A.I.L. V. Anisimov, First-principles calculations of the electronic structure and spectra of strongly correlated systems the LDA+ U method, *J. Phys-Condens. Mat.*, 9 (1997) 767.
- [10] V.V. Anisimov, J. Zaanen, O.K. Andersen, Band theory and Mott insulators: Hubbard U instead of Stoner I, *Physical review. B, Condensed Matter.*, 44 (1991) 943–954.
- [11] E. Sanville, S.D. Kenny, R. Smith, G. Henkelman, Improved grid-based algorithm for bader charge allocation, *J. Comput. Chem.*, 28 (2007) 899–908.
- [12] G. Henkelman, A. Arnaldsson, H. Jónsson, A fast and robust algorithm for bader decomposition of charge density, *Comp. Mater. Sci.*, 36 (2006) 354–360.
- [13] Mansingh, S.; Sultana, S.; Acharya, R.; Ghosh, M.; Parida, K. Efficient photon conversion via double charge dynamics CeO<sub>2</sub>–BiFeO<sub>3</sub> p–n heterojunction photocatalyst promising toward N<sub>2</sub> fixation and phenol–Cr (VI) detoxification. *Inorg. Chem.*, 59 (2020) 3856–3873.
- [14] R. Tao, X. Li, X. Li, C. Shao, Y. Liu, TiO<sub>2</sub>/SrTiO<sub>3</sub>/g-C<sub>3</sub>N<sub>4</sub> Ternary heterojunction nanofibers: Gradient energy band, cascade charge transfer, enhanced photocatalytic hydrogen evolution, and nitrogen fixation. *Nanoscale*, 12 (2020) 8320–8329.
- [15] P. Xing, S. Wu, Y. Chen, P. Chen, X. Hu, H. Lin, L.H. Zhao, Y. He, New application and excellent performance of Ag/KNbO<sub>3</sub> nanocomposite in photocatalytic NH<sub>3</sub> synthesis. *ACS Sustain. Chem. Eng.*, 7 (2019) 12408–12418.

- [16] H. Zhang, X. Li, H. Su, X. Chen, S. Zuo, X. Yan, W. Liu, C. Yao, Sol–Gel synthesis of upconversion perovskite/attapulgite heterostructures for photocatalytic fixation of nitrogen. *J. Sol-Gel Sci. Technol.*, 92 (2019) 154–162.
- [17] S. Zhou, C. Zhang, J. Liu, J. Liao, Y. Kong, Y. Xu, G. Chen, Formation of an oriented  $\text{Bi}_2\text{WO}_6$  photocatalyst induced by in situ bi reduction and its use for efficient nitrogen fixation. *Catal. Sci. Technol.*, 9 (2019) 5562–5566.
- [18] C. Zhang, G. Chen, C. Lv, Y. Yao, Y. Xu, X. Jin, Q. Meng, Enabling nitrogen fixation on  $\text{Bi}_2\text{WO}_6$  Photocatalyst by C-PAN Surface Decoration. *ACS Sustain. Chem. Eng.*, 2018, 6 (9), 11190–11195.
- [19] X. Chen, M.Y. Qi, Y.H. Li, Z.R. Tang, Y.J. Xu, Enhanced ambient ammonia photosynthesis by Mo-doped  $\text{Bi}_5\text{O}_7\text{Br}$  nanosheets with light-switchable oxygen vacancies, *Chinese J. Catal.*, 42 (2021) 2020–2026.
- [20] X. Chen, X. Zhang, Y.H. Li, M.Y. Qi, J.Y. Li, Z.R. Tang, Z. Zhou, Y.J. Xu, Transition metal doping  $\text{BiOBr}$  nanosheets with oxygen vacancy and exposed {102} facets for visible light nitrogen fixation, *Appl. Catal. B-Environ.*, 281 (2021) 119516.
- [21] J. Wang, T. Wang, Z. Zhao, R. Wang, C. Wang, F. Zhou, S. Li, L. Zhao, M. Feng, Regulation of oxygen vacancies in  $\text{SrTiO}_3$  perovskite for efficient photocatalytic nitrogen fixation, *Journal of Alloys and Compounds: An Interdisciplinary Journal of Materials Science and Solid-state Chemistry and Physics*, 902 (2022) 163865–163872.
- [22] N. Zhang, A. Jalil, D. Wu, S. Chen, Y. Liu, C. Gao, W. Ye, Z. Qi, H. Ju, C. Wang, Refining defect states in  $\text{W}_{18}\text{O}_{49}$  by Mo doping: A strategy for tuning  $\text{N}_2$  activation towards solar-driven nitrogen fixation, *J. Am. Chem. Soc.*, 140 (2018) 9434.

- [23] J. Yang, Y. Guo, R. Jiang, F. Qin, H. Zhang, W. Lu, J. Wang, J.C. Yu, High-efficiency "working-in-tandem" nitrogen photofixation achieved by assembling plasmonic gold nanocrystals on ultrathin titania nanosheets, *J. Am. Chem. Soc.*, 140 (2018) 8497.
- [24] Y. Hao, X. Dong, S. Zhai, H. Ma, X. Wang, X. Zhang, Hydrogenated bismuth molybdate nanoframe for efficient sunlight-driven nitrogen fixation from air, *Chem. Eur. J.*, 22 (2016) 18722.
- [25] H. Han, Y. Yang, J. Liu, X. Zheng, X. Wang, S. Meng, S. Zhang, X. Fu, S. Chen, Effect of Zn vacancies in  $Zn_3In_2S_6$  nanosheets on boosting photocatalytic  $N_2$  Fixation, *ACS Appl. Energ. Mater.*, 3 (2020) 11275.
- [26] D. Wu, R. Wang, C. Yang, Y. An, H. Lu, H. Wang, K. Cao, Z. Gao, W. Zhang, F. Xu, Br doped porous bismuth oxychloride micro-sheets with rich oxygen vacancies and dominating {001} facets for enhanced nitrogen photo-fixation performances, *J. Colloid Interf. Sci.*, 556 (2019) 111.
- [27] S. Sun, X. Li, W. Wang, L. Zhang, X. Sun, Photocatalytic robust solar energy reduction of dinitrogen to ammonia on ultrathin  $MoS_2$ , *Appl. Catal. B-Environ.*, 200 (2017) 323.
- [28] Y. Zhao, Y. Zhao, R. Shi, B. Wang, G.I.N. Waterhouse, L.Z. Wu, C.H. Tung, T. Zhang, Tuning oxygen vacancies in ultrathin  $TiO_2$  nanosheets to boost photocatalytic nitrogen fixation up to 700 nm, *Adv. Mater.*, 31 (2019) 1806482.
- [29] N. Zhang, L. Li, Q. Shao, T. Zhu, X. Huang, X. Xiao, Fe-doped  $BiOCl$  nanosheets with light-switchable oxygen vacancies for photocatalytic nitrogen fixation, *ACS Appl. Energ. Mater.*, 2 (2019) 8394.
- [30] Y. Liu, Z. Hu, J. C. Yu, Fe enhanced visible-light-driven nitrogen fixation on  $BiOBr$  nanosheets, *Chem. Mater.*, 32 (2020) 1488–1494.



- [31] X. Xue, R. Chen, C. Yan, Y. Hu, W. Zhang, S. Yang, L. Ma, G. Zhu, Z. Jin, Efficient photocatalytic nitrogen fixation under ambient conditions enabled by the heterojunctions of n-type  $\text{Bi}_2\text{MoO}_6$  and oxygen-vacancy-rich p-type  $\text{BiOBr}$ , *Nanoscale*, 11 (2019) 10439.
- [32] S. Cao, B. Fan, Y. Feng, H. Chen, F. Jiang, X. Wang, Sulfur-doped g- $\text{C}_3\text{N}_4$  nanosheets with surface carbon vacancies: General synthesis and improved activity for simulated solar-light photocatalytic nitrogen fixation, *Chem. Eng. J.*, 353 (2018) 147–156.
- [33] J. Di, J. Xia, M. F. Chisholm, J. Zhong, C. Chen, X. Cao, F. Dong, Z. Chi, H. Chen, Y. X. Weng, Defect-tailoring mediated electron-hole separation in single-unit-cell  $\text{Bi}_3\text{O}_4\text{Br}$  nanosheets for boosting photocatalytic hydrogen evolution and nitrogen fixation, *Adv. Mater.*, 31 (2019) 1807576.
- [34] S. Wang, X. Hai, X. Ding, K. Chang, Y. Xiang, X. Meng, Z. Yang, H. Chen, J. Ye, Photocatalysis: Light-switchable oxygen vacancies in ultrafine  $\text{Bi}_5\text{O}_7\text{Br}$  nanotubes for boosting solar-driven nitrogen fixation in pure water, *Adv. Mater.*, 29 (2017) 1701774.
- [35] M. Zhong, Z. Wang, D. Dai, B. Yang, S. Zuo, C. Yao, F. Wu, X. Li, Upconversion hollow nanospheres  $\text{CeF}_3$  co-doped with  $\text{Yb}^{3+}$  and  $\text{Tm}^{3+}$  for photocatalytic nitrogen fixation. *J. Rare Earth.*, 40 (2022) 586–594
- [36] P. Xia, X. Pan, S. Jiang, J. Yu, B. He, P.M. Ismail, W. Bai, J. Yang, H. Zhang, M. Cheng, H. Li, Q. Zhang, C. Xiao, Y. Xie, Designing a redox heterojunction for photocatalytic “overall nitrogen fixation” under mild conditions. *Adv. Mater.*, 34 (2022) 2200563.
- [37] N. Ojha, A. Bajpai, S. Kumar, Enriched oxygen vacancies of  $\text{Cu}_2\text{O}/\text{SnS}_2/\text{SnO}_2$  heterostructure for enhanced photocatalytic reduction of  $\text{CO}_2$  by water and nitrogen fixation. *J. Colloid Interf. Sci.*, 585 (2021) 764–77.
- [38] X. Liu, Y. Luo, C. Ling, Y. Shi, G. Zhan, H. Li, H. Gu, K. Wei, F. Guo, Z. Ai, L. Zhang, Rare

- earth La single atoms supported  $\text{MoO}_{3-x}$  for efficient photocatalytic nitrogen fixation. *Appl. Catal. B-Environ.*, 301 (2022) 120766.
- [39] X. Bian, Y. Zhao, S. Zhang, D. Li, R. Shi, C. Zhou, L.Z. Wu, T. Zhang, Enhancing the supply of activated hydrogen to promote photocatalytic nitrogen fixation. *ACS Mater. Lett.*, 3 (2021) 1521–1527.
- [40] H. Maimaitizi, A. Abulizi, T. Zhang, K. Okitsu, J. Zhu, Facile photo-ultrasonic assisted synthesis of flower-like Pt/N-MoS<sub>2</sub> microsphere as an efficient sonophotocatalyst for nitrogen fixation. *Ultrason. Sonochem.*, 63 (2020) 104956.
- [41] X. Yao, W. Zhang, J. Huang, Z. Du, X. Hong, X. Chen, X. Hu, X. Wang, Enhanced photocatalytic nitrogen fixation of Ag/B-doped g-C<sub>3</sub>N<sub>4</sub> nanosheets by one-step in-situ decomposition-thermal polymerization method. *Appl. Catal. Gen.*, 601 (2020) 117647.
- [42] W. Gao, X. Li, X. Zhang, S. Su, S. Luo, R. Huang, Y. Jing, M. Luo, Photocatalytic nitrogen fixation of metal–organic frameworks (MOFs) excited by ultraviolet light: Insights into the nitrogen fixation mechanism of missing metal cluster or linker defects. *Nanoscale*, 13 (2021) 7801–7809.
- [43] X. Li, L. Chen, J. Wang, J. Zhang, C. Zhao, H. Lin, Y. Wu, Y. He, Novel platinum-bismuth alloy loaded  $\text{KTa}_{0.5}\text{Nb}_{0.5}\text{O}_3$  composite photocatalyst for effective nitrogen-to-ammonium conversion. *J. Colloid Interf. Sci.*, 618 (2022) 362–74.
- [44] C. Xiao, H. Hu, X. Zhang, D.R. MacFarlane, Nanostructured gold/bismutite hybrid heterocatalysts for plasmon-enhanced photosynthesis of ammonia. *ACS Sustain. Chem. Eng.*, 5 (2017) 10858–63.
- [45] X. Gao, Y. Shang, L. Liu, K. Gao, Ag plasmon resonance promoted 2D AgBr- $\delta$ -Bi<sub>2</sub>O<sub>3</sub> nanosheets with enhanced photocatalytic ability. *J. Alloys Compd.*, 2019, 803: 565–75.

- [46] C. Liang, H.Y. Niu, H. Guo, Efficient photocatalytic nitrogen fixation to ammonia over bismuth monoxide quantum dots-modified defective ultrathin graphitic carbon nitride. *Chem. Eng. J.*, 406 (2021) 126868.
- [47] E. Vesali-Kermani, A. Habibi-Yangjeh, H. Diarmand-Khalilabad, S. Ghosh, Nitrogen photofixation ability of g-C<sub>3</sub>N<sub>4</sub> nanosheets/Bi<sub>2</sub>MoO<sub>6</sub> heterojunction photocatalyst under visible-light illumination. *J. Colloid Interf. Sci.*, 563 (2020) 81–91.
